# Supplementary material for: PTEN Inhibitor Treatment Lowers Muscle Plasma Membrane Damage and Enhances Muscle ECM Homeostasis after High-Intensity Eccentric Exercise in Mice
Source: MDPI journal article supplement (doi:10.3390/ijms24129954), 2023-06-09
Supplement: s1 [file s1]

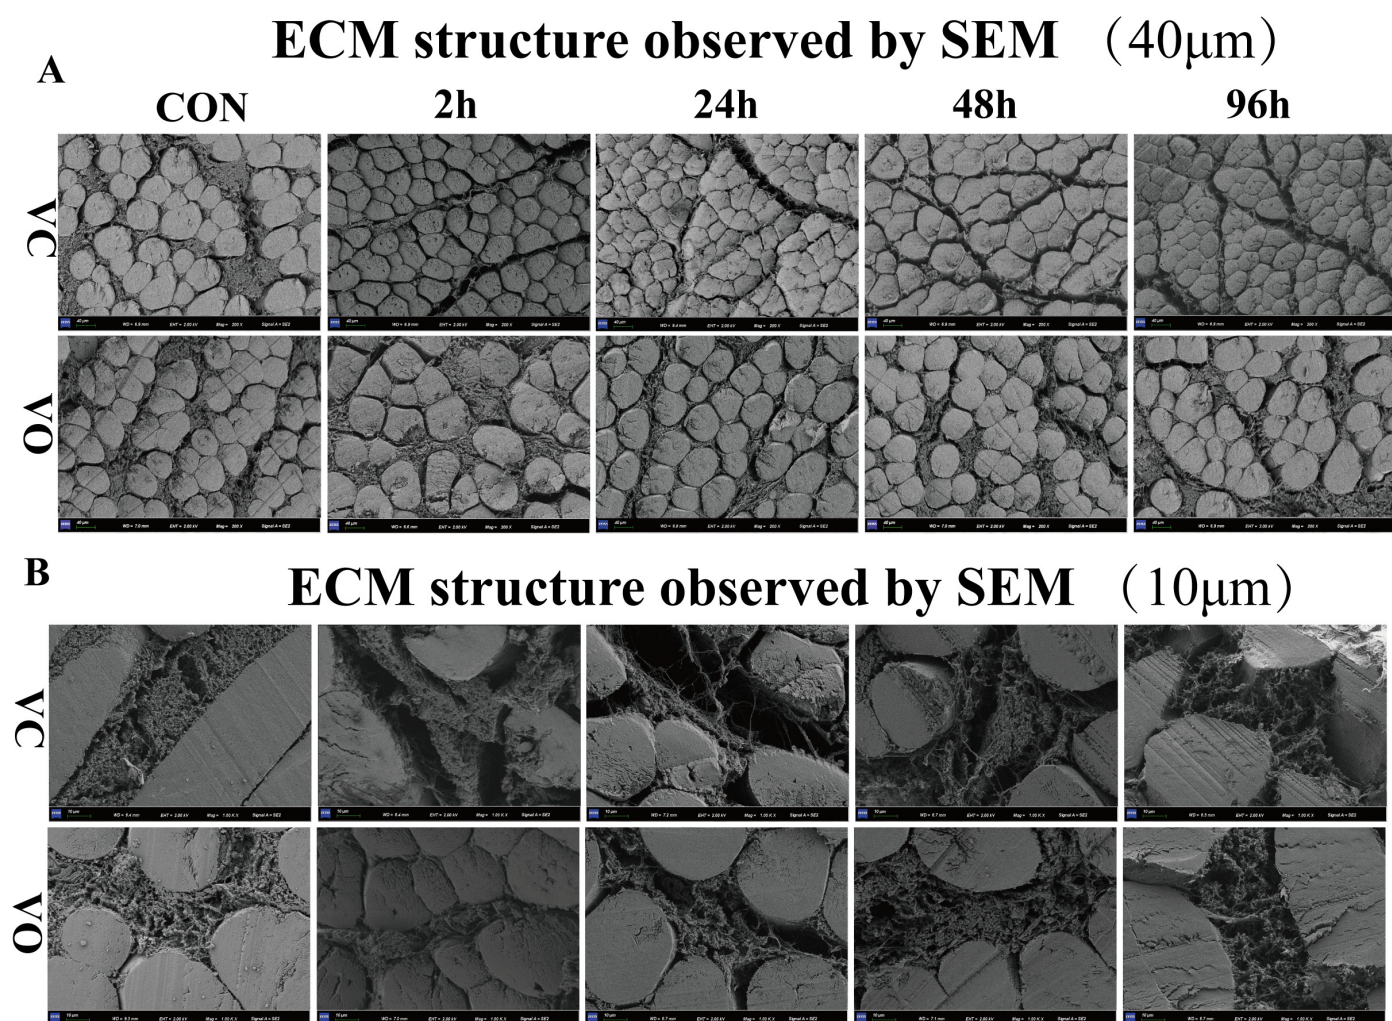

**Figure S1.** Representative scanning electron microscopy images of cross-sectional ECM skeletal muscle, scale bars (A) 40  $\mu$ m (B) 10  $\mu$ m.
